# Supplementary material
Source: HighWire-hosted journal article supplement (http://dmd.aspetjournals.org/highwire/filestream/65725/field_highwire_adjunct_files/1/Supplemental_Table2.pdf)
Supplement: Supplemental_Table2.pdf [file Supplemental_Table2.pdf]

**Efficient screening of P450 BM3 mutants for their metabolic activity and diversity towards a wide set of drug-like molecules in chemical space**

Jelle Reinen, Jolanda S. van Leeuwen, Yongmin Li, Lifang Sun, Peter D. J. Grootenhuis, Caroline J. Decker, John Saunders, Nico P. E. Vermeulen and Jan N. M. Commandeur

*Drug Metabolism and Disposition*

Supplemental Table 2 Detailed information of the 43 drugs used in this study.

| Drug name     | Structure                                                                           | MW     | cLogP <sup>a</sup> | cLogD <sup>a</sup> | Charge <sup>a</sup> | PSA <sup>a</sup> | CYP <sup>b</sup>          |
|---------------|-------------------------------------------------------------------------------------|--------|--------------------|--------------------|---------------------|------------------|---------------------------|
| Alprazolam    | 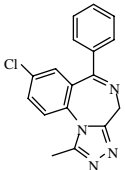   | 308.77 | 2.56               | 2.17               | 0                   | 43.07            | 3A4                       |
| Amitriptyline |  | 277.18 | 4.85               | 2.20               | +                   | 3.24             | 2D6<br>2C9<br>2C19<br>1A2 |
| Aprepitant    |  | 534.43 | 4.83               | 6.24               | 0                   | 83.24            | 3A4<br>2C19<br>1A2 *      |
| Aripiprazole  |  | 448.39 | 5.31               | 4.46               | +                   | 32.7             | 3A4<br>2D6                |
| Astemizole    |  | 458.58 | 6.09               | 4.46               | +                   | 44.81            | 3A4                       |

|                  |                                                                                     |        |      |      |   |       |                     |
|------------------|-------------------------------------------------------------------------------------|--------|------|------|---|-------|---------------------|
| Buspirone        | 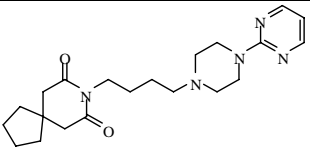   | 385.51 | 2.19 | 1.18 | + | 69.64 | 3A4                 |
| Carbamazepine    |    | 236.27 | 2.38 | 3.22 | 0 | 46.33 | 3A4<br>2C8 *        |
| Carvedilol       |    | 406.47 | 4.04 | 1.94 | + | 75.74 | 2D6                 |
| Cilostazol       |    | 369.46 | 3.53 | 2.97 | 0 | 81.93 | 3A4                 |
| Cinacalcet       |   | 357.41 | 6.35 | 3.47 | + | 12.03 | 3A4<br>2D6<br>1A2 * |
| Citalopram       |  | 324.39 | 3.13 | 1.19 | + | 36.26 | 2C19                |
| Dextromethorphan |  | 271.4  | 3.95 | 1.89 | + | 12.47 | 3A4<br>2D6          |
| Diclofenac       |  | 296.15 | 4.73 | 0.74 | - | 49.33 | 2C9                 |
| Diltiazem        |  | 414.16 | 3.65 | 1.83 | + | 59.08 | 3A4                 |
| Duloxetine       |  | 297.42 | 4.26 | 1.85 | + | 21.26 | 2D6                 |

|              |                                                                                     |        |      |       |   |        |                    |
|--------------|-------------------------------------------------------------------------------------|--------|------|-------|---|--------|--------------------|
| Glipizide    | 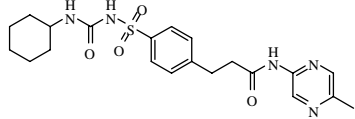   | 445.54 | 2.57 | -0.03 | - | 130.15 | 2C9                |
| Imatinib     |    | 493.6  | 4.53 | 2.90  | + | 86.28  | 3A4                |
| Indomethacin |    | 357.79 | 4.18 | -0.02 | - | 68.53  | 2C19               |
| Irbesartan   |    | 428.53 | 6.04 | 3.04  | - | 87.13  | 2C9                |
| Lacosamide   |   | 250.29 | 0.39 | -0.06 | 0 | 67.43  | 2C19 **            |
| Meloxicam    |  | 351.4  | 2.29 | -0.07 | - | 99.6   | 2C9                |
| Midazolam    |  | 325.77 | 3.42 | 3.08  | 0 | 30.18  | 3A4                |
| Minaprine    |  | 298.38 | 3.19 | 1.83  | 0 | 50.28  | 2D6                |
| Nelfinavir   |  | 567.79 | 5.84 | 4.28  | 0 | 101.9  | 3A4<br>2C19        |
| Nicotine     |  | 162.23 | 0.88 | 0.10  | + | 16.13  | 3A4<br>2C19<br>2D6 |

|             |                                                                                     |        |      |      |   |        |                   |
|-------------|-------------------------------------------------------------------------------------|--------|------|------|---|--------|-------------------|
|             |                                                                                     |        |      |      |   |        | 1A2 *             |
| Nifedipine  | 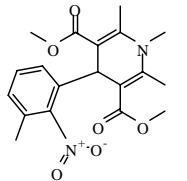   | 346.33 | 3.13 | 1.64 | 0 | 107.77 | 3A4               |
| Nilotinib   |    | 529.52 | 5.84 | 4.18 | 0 | 97.62  | 3A4 *             |
| Ondansetron |    | 293.36 | 2.72 | 1.76 | + | 39.82  | 3A4<br>2D6<br>1A2 |
| Paroxetine  |   | 329.37 | 4.24 | 0.90 | + | 39.72  | 2D6               |
| Phenacetine |  | 179.22 | 1.77 | 1.46 | 0 | 38.33  | 2D6<br>1A2        |
| Pimozide    |  | 461.55 | 6.40 | 5.37 | + | 41.03  | 3A4               |
| Propafenone |  | 341.44 | 3.64 | 0.88 | + | 58.56  | 2D6               |
| Quinidine   |  | 324.42 | 2.79 | 1.46 | + | 45.59  | 3A4               |
| Repaglinide |  | 452.59 | 5.30 | 1.65 | - | 78.87  | 2C8               |

|               |                                                                                     |        |      |      |   |        |                   |
|---------------|-------------------------------------------------------------------------------------|--------|------|------|---|--------|-------------------|
| Rosiglitazone | 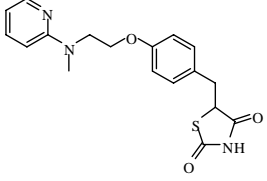   | 357.43 | 3.02 | 2.12 | - | 71.53  | 2C8<br>2C9 *      |
| R-warfarin    |    | 308.33 | 2.90 | 0.60 | - | 67.51  | 2C19<br>1A2       |
| Saquinavir    |    | 670.85 | 4.73 | 2.33 | 0 | 166.75 | 3A4               |
| Sorafenib     |    | 464.84 | 5.45 | 4.32 | 0 | 92.35  | 3A4 *             |
| Tamoxifen     |  | 371.51 | 6.82 | 4.97 | + | 12.47  | 3A4<br>2D6<br>2C9 |
| Terfenadine   |  | 471.67 | 6.07 | 4.82 | + | 43.7   | 3A4               |
| Thioridazine  |  | 370.57 | 6.0  | 3.95 | + | 6.48   | 2D6               |
| Tipranavir    |  | 602.66 | 7.55 | 4.62 | - | 105.59 | 3A4 *             |

|                  |                                                                                   |           |                          |                          |                           |                        |                        |
|------------------|-----------------------------------------------------------------------------------|-----------|--------------------------|--------------------------|---------------------------|------------------------|------------------------|
| Verapamil        | 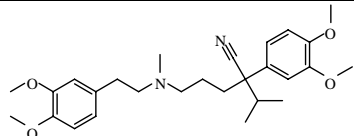 | 454.61    | 4.47                     | 2.29                     | +                         | 63.95                  | 3A4<br>1A2             |
| <b>Drug name</b> | <b>Structure</b>                                                                  | <b>MW</b> | <b>cLogP<sup>a</sup></b> | <b>cLogD<sup>a</sup></b> | <b>Charge<sup>a</sup></b> | <b>PSA<sup>a</sup></b> | <b>CYP<sup>b</sup></b> |

<sup>a</sup> Compound properties (cLogP, cLogD, charge and polar surface area (PSA)) were calculated using an in-house database program. Charges were defined as either positive (+), negative (-) or neutral (0).

<sup>b</sup> Human P450 phenotyping information was obtained from either the University of Indiana Cytochrome P450 Drug Interaction Table, the McGraw-Hill's Access Medicine database<sup>(\*)</sup>, or the University of Washington metabolism and transport drug interaction database<sup>(\*\*)</sup>.
